# Supplementary material for: Cortical and Subcortical Brain Volumes Partially Mediate the Association between Dietary Composition and Behavioral Disinhibition: A UK Biobank Study
Source: MDPI journal article supplement (doi:10.3390/nu13103542), 2021-10-09
Supplement: s1 [file s1]

## Supplementary methods

Below several supplemental tables show the composition of the dietary components based on the FFQ items, as well as the composition of the Disinhibition score based on assorted impulsivity related items and information.

Table S1. UK Biobank items related to disinhibition, impulsivity, compulsivity and/or emotional instability and their binarised response categories.

| Data-field | Source | Description                                                                                                                                               | Response categories (original) |                          | Response categories (binary) |                                                                                |
|------------|--------|-----------------------------------------------------------------------------------------------------------------------------------------------------------|--------------------------------|--------------------------|------------------------------|--------------------------------------------------------------------------------|
| 1239       | IAV    | Do you smoke tobacco now?                                                                                                                                 | -                              | No                       | -                            | No / only occasionally                                                         |
|            |        |                                                                                                                                                           | -                              | Yes, on all/most days    | -                            | Yes, on all/most days                                                          |
|            |        |                                                                                                                                                           | -                              | Only occasionally        |                              |                                                                                |
| 1920       | IAV    | Does your mood often go up and down?                                                                                                                      | -                              | No                       | -                            | No                                                                             |
|            |        |                                                                                                                                                           | -                              | Yes                      | -                            | Yes                                                                            |
| 1940       | IAV    | Are you an irritable person?                                                                                                                              | -                              | No                       | -                            | No                                                                             |
|            |        |                                                                                                                                                           | -                              | Yes                      | -                            | Yes                                                                            |
| 1960       | IAV    | Do you often feel fed-up?                                                                                                                                 | -                              | No                       | -                            | No                                                                             |
|            |        |                                                                                                                                                           | -                              | Yes                      | -                            | Yes                                                                            |
| 20544      | MHQ    | Have you been diagnosed with one or more of the following mental health problems by a professional, even if you don't have it currently? (tick box)       | -                              | OCD                      | -                            | No                                                                             |
|            |        |                                                                                                                                                           | -                              | Mania                    | -                            | Yes                                                                            |
|            |        |                                                                                                                                                           | -                              | ADHD                     |                              | (per diagnosis)                                                                |
| 20548      | MHQ    | Try to remember a period when you were in a "high" or "irritable" state (tick box) (conditional to: ever had period of extreme irritability/excitability) | -                              | More restless than usual | -                            | No                                                                             |
|            |        |                                                                                                                                                           | -                              | Thoughts were racing     | -                            | Yes, ever had period of mania/irritability with at least one of these symptoms |
|            |        |                                                                                                                                                           | -                              | Easily distracted        |                              |                                                                                |
|            |        |                                                                                                                                                           | -                              | More active than usual   |                              |                                                                                |
| 20401      | MHQ    | Have you been addicted to or dependent on one or more things, including substances (not                                                                   | -                              | No                       | -                            | No                                                                             |
|            |        |                                                                                                                                                           | -                              | Yes                      | -                            | Yes                                                                            |

|                 |     |                                                                                                              |                               |                                                                                          |                                                       |
|-----------------|-----|--------------------------------------------------------------------------------------------------------------|-------------------------------|------------------------------------------------------------------------------------------|-------------------------------------------------------|
|                 |     | cigarettes/coffee) or behaviours<br>(such as gambling)?                                                      |                               |                                                                                          |                                                       |
| 20416           | MHQ | How often do you have six or more drinks on one occasion?<br>(conditional to: frequency of drinking alcohol) | -                             | Never<br>Less than monthly<br>Monthly<br>Weekly<br>(Almost) daily                        | - Never / less than weekly<br>Weekly / (almost) daily |
| 20453           | MHQ | Have you taken cannabis (marijuana, grass etc.), even if it was a long time ago?                             | -                             | No<br>Yes, 1-2 times<br>Yes, 3-10 times<br>Yes, 11-100 times<br>Yes, more than 100 times | - No / less than 11 times<br>Yes, 11 times / more     |
| 20480           | MHQ | Have you deliberately harmed yourself, whether or not you meant to end your life?                            | -                             | No<br>Yes                                                                                | - No<br>Yes                                           |
| 41202 and 41204 | LHR | Main or secondary ICD-10 diagnoses from hospital inpatient records                                           | See supplementary table ST1.2 | -                                                                                        | No<br>Yes<br>(per diagnostic group)                   |

Abbreviations: IAV= initial assessment visit, MHQ= mental health questionnaire, LHR= linked health records, ICD-10= international classification of diagnoses, 10<sup>th</sup> edition.

Table S2. ICD-10 diagnoses related to impulsivity, compulsivity and/or emotional instability per diagnostic group.

|               |      |                                                                                   |
|---------------|------|-----------------------------------------------------------------------------------|
| Addiction     | F102 | Dependence syndrome of alcohol                                                    |
|               | F112 | Dependence syndrome of opioids                                                    |
|               | F122 | Dependence syndrome of cannabinoids                                               |
|               | F132 | Dependence syndrome of sedatives or hypnotics                                     |
|               | F142 | Dependence syndrome of cocaine                                                    |
|               | F152 | Dependence syndrome of other stimulants                                           |
|               | F162 | Dependence syndrome of hallucinogens                                              |
|               | F192 | Dependence syndrome of multiple drug use and use of other psychoactive substances |
| Externalising | F900 | Disturbance of activity and attention                                             |

|       |      |                                                                                      |
|-------|------|--------------------------------------------------------------------------------------|
|       | F901 | Hyperkinetic conduct disorder                                                        |
|       | F908 | Other hyperkinetic disorders                                                         |
|       | F909 | Hyperkinetic disorder unspecified                                                    |
|       | F910 | Conduct disorder confined to the family context                                      |
|       | F911 | Unsocialised conduct disorder                                                        |
|       | F912 | Socialised conduct disorder                                                          |
|       | F913 | Oppositional defiant disorder                                                        |
|       | F918 | Other conduct disorders                                                              |
|       | F919 | Conduct disorder unspecified                                                         |
|       | F920 | Depressive conduct disorder                                                          |
|       | F928 | Other mixed disorders of conduct and emotions                                        |
|       | F929 | Mixed disorder of conduct and emotions unspecified                                   |
| Mania | F300 | Hypomania                                                                            |
|       | F301 | Mania without psychotic symptoms                                                     |
|       | F302 | Mania with psychotic symptoms                                                        |
|       | F308 | Other manic episodes                                                                 |
|       | F309 | Manic episode unspecified                                                            |
|       | F310 | Bipolar affective disorder current episode hypomanic                                 |
|       | F311 | Bipolar affective disorder current episode manic without psychotic symptoms          |
|       | F312 | Bipolar affective disorder current episode manic with psychotic symptoms             |
|       | F313 | Bipolar affective disorder current episode mild or moderate depression               |
|       | F314 | Bipolar affective disorder current episode severe depression w/o psychotic symptoms  |
|       | F315 | Bipolar affective disorder current episode severe depression with psychotic symptoms |
|       | F316 | Bipolar affective disorder current episode mixed                                     |
|       | F317 | Bipolar affective disorder currently in remission                                    |
|       | F318 | Other bipolar affective disorders                                                    |
|       | F319 | Bipolar affective disorder unspecified                                               |
| OCD   | F420 | Predominantly obsessional thoughts or ruminations                                    |
|       | F421 | Predominantly compulsive acts [obsessional rituals]                                  |
|       | F422 | Mixed obsessional thoughts and acts                                                  |
|       | F428 | Other obsessive-compulsive disorders                                                 |

|      |                                                                 |
|------|-----------------------------------------------------------------|
| F429 | Obsessive-compulsive disorder unspecified                       |
| F633 | Trichotillomania                                                |
| F950 | Transient tic disorder                                          |
| F951 | Chronic motor or vocal tic disorder                             |
| F952 | Combined vocal and multiple motor tic disorder [de la Tourette] |
| F958 | Other tic disorders                                             |
| F959 | Tic disorder unspecified                                        |
| F605 | Anankastic personality disorder                                 |

|             |      |                                                                                      |
|-------------|------|--------------------------------------------------------------------------------------|
| Personality | F603 | Emotionally unstable personality disorder                                            |
| Risk-taking | F100 | Acute intoxication with alcohol                                                      |
|             | F101 | Harmful use of alcohol                                                               |
|             | F110 | Acute intoxication of opioids                                                        |
|             | F111 | Harmful use of opioids                                                               |
|             | F120 | Acute intoxication cannabinoids                                                      |
|             | F121 | Harmful use cannabinoids                                                             |
|             | F130 | Acute intoxication of sedatives or hypnotics                                         |
|             | F131 | Harmful use of sedatives or hypnotics                                                |
|             | F140 | Acute intoxication of cocaine                                                        |
|             | F141 | Harmful use of cocaine                                                               |
|             | F150 | Acute intoxication of other stimulants                                               |
|             | F151 | Harmful use of other stimulants                                                      |
|             | F160 | Acute intoxication of hallucinogens                                                  |
|             | F161 | Harmful use of hallucinogens                                                         |
|             | F190 | Acute intoxication due to multiple drug use and use of other psychoactive substances |
|             | F191 | Harmful use due to multiple drug use and use of other psychoactive substances        |
|             | F630 | Pathological gambling                                                                |
|             | F631 | Pathological fire-setting [pyromania]                                                |
|             | F632 | Pathological stealing [kleptomania]                                                  |
|             | F638 | Other habit and impulse disorders                                                    |
|             | F639 | Habit and impulse disorder unspecified                                               |

Table S3: Cases per behavioural group, its sensitivity and factor loading.

| Group         | Loading | Definition                                                                                                                                                                                                                                                                 |
|---------------|---------|----------------------------------------------------------------------------------------------------------------------------------------------------------------------------------------------------------------------------------------------------------------------------|
| Externalising | 0.589   | a) participant self-reports diagnosis of ADHD by professional – OR –<br>b) hospital diagnosis of any externalising disorder                                                                                                                                                |
| OCD           | 0.591   | a) participant self-reports diagnosis of OCD by professional – OR –<br>b) hospital diagnosis of OCD/tic disorder/trichotillomania/anankastic PD                                                                                                                            |
| Addiction     | 0.708   | a) participant self-reports past or current addiction – OR –<br>b) hospital diagnosis of substance dependence syndrome                                                                                                                                                     |
| Self-harm     | 0.637   | a) participant self-reports past or current self-harm                                                                                                                                                                                                                      |
| Personality   | 0.536   | a <sub>1</sub> ) participant self-reports moods going up and down – AND –<br>a <sub>2</sub> ) participant self-reports being easily fed-up – AND –<br>a <sub>3</sub> ) participant self-reports being irritable – OR –<br>b) hospital diagnosis of emotionally unstable PD |
| Mania         | 0.613   | a) participant self-reports diagnosis of mania by professional – OR –<br>b) hospital diagnosis of mania/bipolar disorder – OR –<br>c) participant has experienced period with at least one symptom of mania                                                                |
| Risk-taking   | 0.335   | a) participant self-reports weekly binge-drinking – OR –<br>b) hospital diagnosis of acute intoxication with alcohol/drugs                                                                                                                                                 |
| Cannabis      | 0.552   | a) participant self-reports having used cannabis >10 times in life                                                                                                                                                                                                         |
| Smoking       | 0.475   | a) participant self-reports current daily smoking                                                                                                                                                                                                                          |

Abbreviations: ADHD = attention-deficit/hyperactivity disorder; OCD = obsessive-compulsive disorder; PD = personality disorder

Table S4. UK Biobank items related to diet. Note that items related to alcohol intake are not included, since heavy drinking contributed to our outcome of interest.

| Type       | UKB ID | Item              | Unit                                                                |
|------------|--------|-------------------|---------------------------------------------------------------------|
| Continuous | 1289   | Cooked vegetables | Tablespoons / day                                                   |
|            | 1299   | Raw vegetables    | Tablespoons / day                                                   |
|            | 1309   | Fresh fruit       | Pieces / day                                                        |
|            | 1319   | Dried fruit       | Pieces / day                                                        |
|            | 1438   | Bread             | Slices / week                                                       |
|            | 1458   | Cereal            | Bowls / week                                                        |
|            | 1488   | Tea               | Cups / day                                                          |
|            | 1498   | Coffee            | Cups / day                                                          |
|            | 1528   | Water             | Glasses / day                                                       |
| Frequency  | 1329   | Oily fish         | Times / week                                                        |
|            | 1339   | Non-oily fish     | Times / week                                                        |
|            | 1349   | Processed meat    | Times / week                                                        |
|            | 1359   | Poultry           | Times / week                                                        |
|            | 1369   | Beef              | Times / week                                                        |
|            | 1379   | Lamb              | Times / week                                                        |
|            | 1389   | Pork              | Times / week                                                        |
|            | 1408   | Cheese            | Times / week                                                        |
|            | 1478   | Added salt        | Never or rarely / sometimes / usually / always                      |
| Type       | 1418   | Milk              | Full-cream / semi-skimmed / skimmed / soy / other non-dairy / never |

|             |         |                                                                                                                  |
|-------------|---------|------------------------------------------------------------------------------------------------------------------|
| 1428, 2654  | Spreads | Butter / block margarine / tub margarine / benecol / olive-oil based / sunflower-based / low-fat / other / never |
| 1468        | Cereal  | Bran / biscuit / oat / muesli / refined sugar-sweetened / never                                                  |
| 1508        | Coffee  | Decaffeinated / instant / ground / other / never                                                                 |
| 1448        | Bread   | Brown / white / wholegrain / other / never                                                                       |
| Elimination | 6144    | I never eat (tick box) Eggs / dairy / wheat / sugar                                                              |

Table S5. Factor loadings ( $\leq -0.20$  or  $\geq 0.20$ ) per item for each dietary component (DC1-4)

|                                                              | DC1   | DC2   | DC3  | DC4 |
|--------------------------------------------------------------|-------|-------|------|-----|
| Wholegrain bread vs. any other bread                         | 0.59  |       |      |     |
| Dried fruit frequency                                        | 0.48  |       |      |     |
| Oily fish frequency                                          | 0.47  |       | 0.27 |     |
| Raw vegetables / salad frequency                             | 0.45  |       |      |     |
| Fresh fruit frequency                                        | 0.45  |       |      |     |
| Cooked vegetables frequency                                  | 0.37  |       |      |     |
| Water frequency                                              | 0.34  |       |      |     |
| Fish frequency                                               | 0.33  |       | 0.33 |     |
| Cereal frequency                                             | 0.32  |       |      |     |
| Ground coffee vs. any other coffee                           | 0.32  |       |      |     |
| Cereal vs. 'I never eat cereal'                              | 0.29  | -0.22 |      |     |
| Muesli vs. any other cereal                                  | 0.26  |       |      |     |
| Processed meat frequency                                     | -0.24 |       | 0.48 |     |
| Instant coffee vs. any other coffee                          | -0.32 |       |      |     |
| Refined sugar-sweetened cereal products                      | -0.33 |       |      |     |
| White bread vs. any other bread                              | -0.56 |       |      |     |
| 'I never eat dairy' vs. no restrictions                      |       | 0.64  |      |     |
| 'I never eat wheat' vs. no restrictions                      |       | 0.64  |      |     |
| I never eat eggs, sugar, wheat or dairy' vs. no restrictions |       | 0.52  |      |     |
| 'I never eat eggs' vs. no restrictions                       |       | 0.50  |      |     |

|                                               |       |       |
|-----------------------------------------------|-------|-------|
| 'I never eat dairy' vs. no dairy restrictions | 0.33  |       |
| 'I never eat wheat' vs. no wheat restrictions | 0.33  |       |
| Soy milk vs. any other milk                   | 0.27  |       |
| 'I never eat eggs' vs. no eggs restrictions   | 0.23  |       |
| Other bread vs. any other bread               | 0.21  |       |
| Other milk vs. any other milk                 | 0.20  |       |
| Coffee vs. 'I never drink coffee'             | -0.20 |       |
| Milk vs. 'I never drink milk'                 | -0.23 | 0.27  |
| Bread frequency                               | -0.26 |       |
| 'I never eat sugar' vs. no restrictions       | -0.35 |       |
| Bread vs. 'I never eat bread'                 | -0.38 |       |
| Lamb frequency                                |       | 0.75  |
| Beef frequency                                |       | 0.73  |
| Pork frequency                                |       | 0.73  |
| Poultry frequency                             |       | 0.40  |
| Added salt frequency                          |       | 0.31  |
| Fat content of milk                           |       | 0.83  |
| Semi-skimmed milk vs. any other milk          |       | 0.55  |
| Full cream milk vs. any other milk            |       | 0.30  |
| Butter vs. any other spread                   |       | 0.28  |
| Cheese frequency                              |       | 0.25  |
| Skimmed milk vs. any other milk               |       | -0.84 |
